# Supplementary material for: Host–guest inclusion complexes of α and β-cyclodextrins with α-amino acids
Source: Royal Society of Chemistry journal article supplement (doi:10.1039/c4ra07877b), 2014-01-01
Supplement: c4ra07877b1.pdf [file c4ra07877b1.pdf]

## Supporting Information

### **Theory:**

The physical properties of binary mixtures in different mass fractions ( $w_n=0.001, 0.003, 0.005$ , where  $n=1, 2$  for  $\alpha$ - and  $\beta$ -CD respectively) of aqueous  $\alpha$ - and  $\beta$ -CD solutions at 298.15K has been reported in Table S1. The experimental measured values of density, viscosity, refractive index of chosen three  $\alpha$ -amino acids (i.e., L-Lys, L-Phe, L-Glu) in different mass fractions of aqueous  $\alpha$ - and  $\beta$ -CD mixture, as a function of concentration (molarity) has been listed in Table S2.

### **Surface tension**

The concentrations at which the inclusion occurred (the break point of the surface tension) have been calculated by solving the equation of two straight lines, and represented in Table 1. For instance, in case of lysine in  $w_1=0.001$  mass fraction of  $\alpha$ -cyclodextrin

$$\gamma = -307.8 c + 74.06$$

$$\gamma = -134.0 c + 67.72$$

$\gamma = 62.84$  and  $c = 0.0364$ .

### **Apparent molar volume**

The apparent molar volumes  $\phi_V$  were determined from the solutions densities using the equation and given in Table S3.

$$\phi_V = M / \rho - 1000(\rho - \rho_o) / m \rho \rho_o \quad (1)$$

where  $M$  is the molar mass of the amino acids,  $m$  is the molality of the solution,  $\rho$  and  $\rho_o$  are the density of the solution and aq.  $\alpha$ - and  $\beta$ -CD mixture respectively.

The limiting apparent molar volumes  $\phi_V^0$  were obtained by a least-square treatment to the plots of  $\phi_V$  versus  $\sqrt{m}$  using the Masson equation<sup>1</sup> and shown in Table S4.

$$\phi_V = \phi_V^0 + S_V^* \cdot \sqrt{m} \quad (2)$$

The standard deviations ( $\sigma$ ) were determined using the following equation:

$$\sigma = \sqrt{\sum (Y_{\text{exp}} - Y_{\text{obs}})^2 / (N - 1)} \quad (3)$$

where  $N$  is the number of data points.

### **Contributions of the zwitterionic end group, CH<sub>2</sub> groups and other alkyl chains of the amino acids to $\phi_V^0$**

The  $\phi_V^0$  value of zwitterionic end group and methylene group, and other alkyl chain of the amino acids were estimated from

$$\phi_V^0 = \phi_V^0(\text{NH}_3^+, \text{COO}^-) + n_c \phi_V^0(\text{CH}_2) \quad (4)$$

$$\phi_V^0(R) = \phi_V^0 - \phi_V^0(\text{NH}_3^+, \text{COO}^-) - \phi_V^0(\text{CH}) \quad (5)$$

$$\phi_V^0(R) = \phi_V^0 - \phi_V^0(\text{NH}_3^+, \text{COO}^-) - \phi_V^0(\text{CH}) - \phi_V^0(\text{CH}_2) \quad (6)$$

### **Hydration Number estimated from apparent molar volume**

The number of water molecules ( $n_H$ ) hydrated to amino acids can be estimated from the value of measured standard partial molar volume. The values of  $\phi_V^0$  of studied amino acids can be expressed as<sup>2</sup>

$$\phi_V^0(\text{amino acid}) = \phi_V^0(\text{int}) + \phi_V^0(\text{elect}) \quad (7)$$

here  $\phi_V^0(\text{int})$  is intrinsic partial molar volumes of amino acids and  $\phi_V^0(\text{elect})$  is electrostriction partial molar volume as a result of hydration of amino acids. The  $\phi_V^0(\text{int})$  consists of two terms: van der Waals volume and volume due to packing effects. The values of  $\phi_V^0(\text{int})$  for the amino acids were calculated from their crystal molar volume by<sup>2</sup> using the following relationship,

$$\phi_V^0(\text{int}) = (0.7 / 0.634) \phi_V^0(\text{cryst}) \quad (8)$$

where, 0.7 is the packing density in an organic crystal and 0.634 is the packing density of randomly packed spheres. The molar volume of crystals  $\phi_V^0(\text{cryst})$  was calculated using the crystal densities of the amino acids represented by Berlin and Pallansch.<sup>3</sup> The hydration numbers is estimated using the relation

$$n_H = \phi_V^0(\text{elect}) / (V_e^0 - V_b^0) \quad (9)$$

where  $V_e^0$  is the molar volume of the electrostricted water and  $V_b^0$  is the molar volume of bulk water. This model implies that for every water molecules taken from the bulk phase to the surroundings of amino acid, the volume is decreased by  $(V_e^0 - V_b^0)$ . The value of  $(V_e^0 - V_b^0)$  is calculated<sup>2</sup> to be -3.0 or -3.3, at 298.15K respectively. The obtained  $n_H$  values are listed in Table S6.

## Viscosity

The experimental viscosity data for the studied systems are listed in Table S2. The relative viscosity ( $\eta_r$ ) has been analyzed using the Jones-Dole equation<sup>4</sup>

$$(\eta/\eta_0 - 1)/\sqrt{m} = (\eta_r - 1)/\sqrt{m} = A + B\sqrt{m} \quad (10)$$

where  $\eta_r = \eta/\eta_0$ ,  $\eta$  and  $\eta_0$  are the relative viscosities, the viscosities of the ternary solutions (amino acid + aq.  $\beta$ -CD) and binary aqueous mixture (aq.  $\beta$ -CD) and  $m$  is the molality of the amino acids in ternary solutions.  $A$  and  $B$  are empirical constants known as viscosity  $A$ - and  $B$ -coefficients, which are specific to solute-solute and solute-solvent interactions, respectively, are estimated by least-square method by plotting  $(\eta_r - 1)/\sqrt{m}$  against  $\sqrt{m}$ , and reported in Table S4.

The  $B$ -coefficients of zwitterionic group  $B(\text{NH}_3^+, \text{COO}^-)$ , the methylene group  $B(\text{CH}_2)$ , and other alkyl group have been resolved as follows

$$B = B(\text{NH}_3^+, \text{COO}^-) + n_c B(\text{CH}_2) \quad (11)$$

$$B(R) = B(\text{NH}_3^+, \text{COO}^-) - B(\text{CH}) \quad (12)$$

$$B(R) = B(\text{NH}_3^+, \text{COO}^-) + B(\text{CH}) - B(\text{CH}_2) \quad (13)$$

## Refractive index

The molar refraction,  $R_M$  can be evaluated from the Lorentz-Lorenz relation<sup>5</sup>

$$R_M = \left\{ \frac{(n_D^2 - 1)}{(n_D^2 + 2)} \right\} (M/\rho) \quad (14)$$

where  $R_M$ ,  $n_D$ ,  $M$  and  $\rho$  are the molar refraction, the refractive index, the molar mass and the density of solution respectively.

The Limiting molar refraction ( $R_M^0$ ) estimated from the following,<sup>6</sup>

$$R_M = R_M^0 + R_S \sqrt{m} \quad (15)$$

## References:

1. D. O. Masson, *Phil Mag.*, 1929, **8**, 218–226.
2. F. J. Millero, A. L. Surdo and C. Shin, *J. Phys. Chem.*, 1978, **82**, 784-792.
3. E. Berlin and M. J. Pallansch, *J. Phys. Chem.*, 1968, **72**, 1887-1889.
4. G. Jones and D. Dole, *J. Am. Chem. Soc.*, 1929, **51**, 2950-2964.
5. V. Minkin, O. Osipov and Y. Zhdanov, *Dipole Moments in Organic Chemistry*. New York, Plenum Press, 1970.
6. M. N. Roy, P. Chakraborti and D. Ekka, *Mol. Phys.*, 2014, In Press, <http://dx.doi.org/10.1080/00268976.2013.880002>.

**Tables:**

**Table S1: Experimental values of density( $\rho$ ), viscosity ( $\eta$ ), refractive index ( $n_D$ ), surface tension ( $\gamma$ ), pH in deferent mass fraction of aqueous  $\alpha$ - and  $\beta$ -cyclodextrin mixtures at 298.15 K<sup>a</sup>**

| Aq. solvent mixture | $\rho \times 10^{-3}$<br>/kg·m <sup>-3</sup> | $\eta$<br>/mP·s | $n_D$  | $\gamma$<br>/mN·m <sup>-1</sup> | pH   |
|---------------------|----------------------------------------------|-----------------|--------|---------------------------------|------|
| aq. $\alpha$ -CD    |                                              |                 |        |                                 |      |
| $w_1 = 0.001$       | 0.99732                                      | 1.300           | 1.3328 | 71.62                           | 6.44 |
| $w_1 = 0.003$       | 0.99792                                      | 1.310           | 1.3331 | 71.49                           | 6.39 |
| $w_1 = 0.005$       | 0.99859                                      | 1.321           | 1.3334 | 71.45                           | 6.32 |
| aq. $\beta$ -CD     |                                              |                 |        |                                 |      |
| $w_2 = 0.001$       | 0.99747                                      | 1.304           | 1.3329 | 71.71                           | 6.65 |
| $w_2 = 0.003$       | 0.99815                                      | 1.313           | 1.3332 | 71.61                           | 6.10 |
| $w_2 = 0.005$       | 0.99890                                      | 1.323           | 1.3336 | 71.57                           | 5.57 |

<sup>a</sup> Standard uncertainties  $u$  are:  $u(\rho) = 5 \times 10^{-5}$  g·cm<sup>-3</sup>,  $u(\eta) = 0.003$  mP·s,  $u(n_D) = 0.0002$ ,  $u(\gamma) = 0.03$  mN·m<sup>-1</sup>,  $u(\text{pH}) = 0.01$ , and  $u(T) = 0.01$ K

**Table S2: Experimental values of density ( $\rho$ ), viscosity ( $\eta$ ), refractive index ( $n_D$ ), and pH of selected amino acids in deferent mass fraction of aqueous  $\alpha$ - and  $\beta$ -cyclodextrin mixtures at 298.15 K<sup>a</sup>**

| molality<br>/mol·kg <sup>-1</sup> | $\rho \times 10^{-3}$<br>/kg·m <sup>-3</sup> | $\eta$<br>/mP·s | $n_D$ | pH | molality<br>/mol·kg <sup>-1</sup> | $\rho \times 10^{-3}$<br>/kg·m <sup>-3</sup> | $\eta$<br>/mP·s | $n_D$  | pH   |
|-----------------------------------|----------------------------------------------|-----------------|-------|----|-----------------------------------|----------------------------------------------|-----------------|--------|------|
| Glycine                           |                                              |                 |       |    | L-Lysine                          |                                              |                 |        |      |
| $w_1 = 0.001^b$                   |                                              |                 |       |    | $w_1 = 0.001^b$                   |                                              |                 |        |      |
| 0.0100                            | 0.99766                                      | 1.309           | -     | -  | 0.0100                            | 0.99773                                      | 1.338           | 1.3330 | 9.76 |
| 0.0251                            | 0.99819                                      | 1.316           | -     | -  | 0.0251                            | 0.99841                                      | 1.363           | 1.3334 | 9.81 |
| 0.0402                            | 0.99873                                      | 1.322           | -     | -  | 0.0403                            | 0.99913                                      | 1.384           | 1.3337 | 9.89 |
| 0.0553                            | 0.99928                                      | 1.327           | -     | -  | 0.0555                            | 0.99989                                      | 1.403           | 1.3341 | 9.94 |
| 0.0704                            | 0.99984                                      | 1.332           | -     | -  | 0.0707                            | 1.00068                                      | 1.421           | 1.3345 | 9.97 |
| 0.0855                            | 1.00040                                      | 1.336           | -     | -  | 0.0859                            | 1.00148                                      | 1.437           | 1.3350 | 9.99 |
| $w_1 = 0.003^b$                   |                                              |                 |       |    | $w_1 = 0.003^b$                   |                                              |                 |        |      |
| 0.0100                            | 0.99826                                      | 1.322           | -     | -  | 0.0100                            | 0.99828                                      | 1.349           | 1.3333 | 9.79 |
| 0.0251                            | 0.99879                                      | 1.331           | -     | -  | 0.0251                            | 0.99889                                      | 1.377           | 1.3337 | 9.84 |

|        |                 |       |        |      |        |                 |       |        |       |
|--------|-----------------|-------|--------|------|--------|-----------------|-------|--------|-------|
| 0.0401 | 0.99934         | 1.338 | -      | -    | 0.0403 | 0.99956         | 1.400 | 1.3340 | 9.92  |
| 0.0552 | 0.99990         | 1.345 | -      | -    | 0.0554 | 1.00027         | 1.422 | 1.3344 | 9.98  |
| 0.0703 | 1.00047         | 1.350 | -      | -    | 0.0707 | 1.00101         | 1.442 | 1.3347 | 10.01 |
| 0.0855 | 1.00105         | 1.355 | -      | -    | 0.0859 | 1.00180         | 1.460 | 1.3351 | 10.05 |
|        | $w_1 = 0.005^b$ |       |        |      |        | $w_1 = 0.005^b$ |       |        |       |
| 0.0100 | 0.99893         | 1.337 | -      | -    | 0.0100 | 0.99890         | 1.362 | 1.3336 | 9.82  |
| 0.0251 | 0.99947         | 1.348 | -      | -    | 0.0251 | 0.99945         | 1.393 | 1.3339 | 9.89  |
| 0.0401 | 1.00003         | 1.357 | -      | -    | 0.0402 | 1.00007         | 1.419 | 1.3342 | 9.96  |
| 0.0552 | 1.00060         | 1.364 | -      | -    | 0.0554 | 1.00074         | 1.443 | 1.3345 | 10.01 |
| 0.0703 | 1.00119         | 1.372 | -      | -    | 0.0706 | 1.00147         | 1.466 | 1.3348 | 10.07 |
| 0.0854 | 1.00179         | 1.378 | -      | -    | 0.0859 | 1.00222         | 1.487 | 1.3352 | 10.12 |
|        | L-Phenylalanine |       |        |      |        | L-Glutamic acid |       |        |       |
|        | $w_1 = 0.001^b$ |       |        |      |        | $w_1 = 0.001^b$ |       |        |       |
| 0.0100 | 0.99777         | 1.347 | 1.3330 | 6.26 | 0.0100 | 0.99795         | 1.328 | 1.3330 | 3.35  |
| 0.0251 | 0.99847         | 1.381 | 1.3335 | 6.12 | 0.0251 | 0.99898         | 1.346 | 1.3334 | 3.28  |
| 0.0403 | 0.99919         | 1.409 | 1.3339 | 6.01 | 0.0402 | 1.00007         | 1.361 | 1.3337 | 3.24  |
| 0.0555 | 0.99992         | 1.435 | 1.3343 | 5.91 | 0.0554 | 1.00121         | 1.375 | 1.3341 | 3.23  |
| 0.0708 | 1.00066         | 1.459 | 1.3347 | 5.82 | 0.0706 | 1.00239         | 1.388 | 1.3345 | 3.22  |
| 0.0861 | 1.00142         | 1.482 | 1.3351 | 5.74 | 0.0858 | 1.00362         | 1.400 | 1.3349 | 3.21  |
|        | $w_1 = 0.003^b$ |       |        |      |        | $w_1 = 0.003^b$ |       |        |       |
| 0.0100 | 0.99831         | 1.358 | 1.3333 | 6.21 | 0.0100 | 0.99850         | 1.339 | 1.3334 | 3.34  |
| 0.0251 | 0.99894         | 1.395 | 1.3337 | 6.08 | 0.0251 | 0.99946         | 1.359 | 1.3337 | 3.28  |
| 0.0403 | 0.99961         | 1.426 | 1.3341 | 5.95 | 0.0402 | 1.00051         | 1.376 | 1.3340 | 3.25  |
| 0.0555 | 1.00031         | 1.454 | 1.3344 | 5.84 | 0.0554 | 1.00162         | 1.392 | 1.3343 | 3.23  |
| 0.0707 | 1.00103         | 1.481 | 1.3348 | 5.76 | 0.0705 | 1.00277         | 1.406 | 1.3346 | 3.22  |
| 0.0861 | 1.00178         | 1.506 | 1.3352 | 5.70 | 0.0857 | 1.00398         | 1.419 | 1.3349 | 3.21  |
|        | $w_1 = 0.005^b$ |       |        |      |        | $w_1 = 0.005^b$ |       |        |       |
| 0.0100 | 0.99891         | 1.372 | 1.3337 | 6.10 | 0.0100 | 0.99912         | 1.351 | 1.3336 | 3.32  |
| 0.0251 | 0.99947         | 1.412 | 1.3341 | 5.95 | 0.0251 | 1.00002         | 1.373 | 1.3339 | 3.27  |
| 0.0403 | 1.00008         | 1.447 | 1.3345 | 5.83 | 0.0402 | 1.00102         | 1.392 | 1.3342 | 3.25  |
| 0.0555 | 1.00074         | 1.479 | 1.3348 | 5.73 | 0.0553 | 1.00207         | 1.409 | 1.3345 | 3.23  |
| 0.0707 | 1.00146         | 1.509 | 1.3351 | 5.68 | 0.0705 | 1.00319         | 1.425 | 1.3348 | 3.22  |
| 0.0860 | 1.00219         | 1.538 | 1.3354 | 5.64 | 0.0857 | 1.00438         | 1.441 | 1.3351 | 3.21  |
|        | Glycine         |       |        |      |        | L-Lysine        |       |        |       |

|        |                 |       |        |      |        |                 |       |        |       |
|--------|-----------------|-------|--------|------|--------|-----------------|-------|--------|-------|
|        | $w_2 = 0.001^b$ |       |        |      |        | $w_2 = 0.001^b$ |       |        |       |
| 0.0100 | 0.99781         | 1.315 | -      | -    | 0.0100 | 0.99786         | 1.322 | 1.3331 | 9.81  |
| 0.0251 | 0.99834         | 1.323 | -      | -    | 0.0251 | 0.99851         | 1.338 | 1.3334 | 9.88  |
| 0.0402 | 0.99889         | 1.330 | -      | -    | 0.0403 | 0.99920         | 1.352 | 1.3338 | 9.93  |
| 0.0553 | 0.99944         | 1.336 | -      | -    | 0.0555 | 0.99992         | 1.364 | 1.3342 | 9.97  |
| 0.0704 | 1.00001         | 1.341 | -      | -    | 0.0707 | 1.00067         | 1.375 | 1.3346 | 9.99  |
| 0.0855 | 1.00058         | 1.346 | -      | -    | 0.0859 | 1.00143         | 1.386 | 1.3350 | 10.01 |
|        | $w_2 = 0.003^b$ |       |        |      |        | $w_2 = 0.003^b$ |       |        |       |
| 0.0100 | 0.99849         | 1.328 | -      | -    | 0.0100 | 0.99848         | 1.319 | 1.3334 | 9.84  |
| 0.0251 | 0.99902         | 1.338 | -      | -    | 0.0251 | 0.99906         | 1.334 | 1.3337 | 9.91  |
| 0.0401 | 0.99957         | 1.347 | -      | -    | 0.0402 | 0.99970         | 1.351 | 1.3341 | 9.95  |
| 0.0552 | 1.00014         | 1.354 | -      | -    | 0.0554 | 1.00039         | 1.368 | 1.3345 | 9.99  |
| 0.0703 | 1.00072         | 1.360 | -      | -    | 0.0706 | 1.00111         | 1.385 | 1.3349 | 10.02 |
| 0.0854 | 1.00131         | 1.367 | -      | -    | 0.0859 | 1.00186         | 1.403 | 1.3353 | 10.04 |
|        | $w_2 = 0.005^b$ |       |        |      |        | $w_2 = 0.005^b$ |       |        |       |
| 0.0100 | 0.99924         | 1.340 | -      | -    | 0.0100 | 0.99918         | 1.327 | 1.3339 | 9.87  |
| 0.0251 | 0.99978         | 1.352 | -      | -    | 0.0251 | 0.99969         | 1.348 | 1.3342 | 9.94  |
| 0.0401 | 1.00034         | 1.361 | -      | -    | 0.0402 | 1.00028         | 1.372 | 1.3345 | 9.99  |
| 0.0552 | 1.00092         | 1.369 | -      | -    | 0.0554 | 1.00093         | 1.396 | 1.3349 | 10.02 |
| 0.0703 | 1.00152         | 1.376 | -      | -    | 0.0706 | 1.00163         | 1.424 | 1.3352 | 10.05 |
| 0.0854 | 1.00213         | 1.384 | -      | -    | 0.0859 | 1.00238         | 1.453 | 1.3356 | 10.08 |
|        | L-Phenylalanine |       |        |      |        | L-Glutamic acid |       |        |       |
|        | $w_2 = 0.001^b$ |       |        |      |        | $w_2 = 0.001^b$ |       |        |       |
| 0.0100 | 0.99788         | 1.318 | 1.3326 | 6.36 | 0.0100 | 0.99808         | 1.323 | 1.3332 | 3.40  |
| 0.0251 | 0.99854         | 1.333 | 1.3330 | 6.18 | 0.0251 | 0.99908         | 1.339 | 1.3336 | 3.32  |
| 0.0403 | 0.99924         | 1.345 | 1.3333 | 6.02 | 0.0402 | 1.00016         | 1.352 | 1.3339 | 3.26  |
| 0.0555 | 0.99996         | 1.357 | 1.3335 | 5.88 | 0.0554 | 1.00129         | 1.364 | 1.3343 | 3.23  |
| 0.0708 | 1.00070         | 1.368 | 1.3338 | 5.76 | 0.0706 | 1.00248         | 1.375 | 1.3346 | 3.21  |
| 0.0861 | 1.00146         | 1.379 | 1.3341 | 5.67 | 0.0858 | 1.00371         | 1.386 | 1.3349 | 3.20  |
|        | $w_2 = 0.003^b$ |       |        |      |        | $w_2 = 0.003^b$ |       |        |       |
| 0.0100 | 0.99849         | 1.321 | 1.3334 | 6.01 | 0.0100 | 0.99870         | 1.325 | 1.3335 | 3.32  |
| 0.0251 | 0.99907         | 1.339 | 1.3338 | 5.90 | 0.0251 | 0.99963         | 1.343 | 1.3338 | 3.25  |
| 0.0403 | 0.99969         | 1.358 | 1.3342 | 5.82 | 0.0402 | 1.00064         | 1.360 | 1.3341 | 3.21  |
| 0.0555 | 1.00036         | 1.378 | 1.3347 | 5.73 | 0.0554 | 1.00173         | 1.376 | 1.3344 | 3.20  |

|        |                 |       |        |      |        |                 |       |        |      |
|--------|-----------------|-------|--------|------|--------|-----------------|-------|--------|------|
| 0.0707 | 1.00106         | 1.398 | 1.3352 | 5.65 | 0.0705 | 1.00286         | 1.393 | 1.3347 | 3.18 |
| 0.0861 | 1.00178         | 1.420 | 1.3357 | 5.61 | 0.0857 | 1.00407         | 1.410 | 1.3350 | 3.17 |
|        | $w_2 = 0.005^b$ |       |        |      |        | $w_2 = 0.005^b$ |       |        |      |
| 0.0100 | 0.99916         | 1.328 | 1.3338 | 5.49 | 0.0100 | 0.99939         | 1.329 | 1.3338 | 3.30 |
| 0.0251 | 0.99965         | 1.355 | 1.3342 | 5.40 | 0.0251 | 1.00024         | 1.349 | 1.3341 | 3.24 |
| 0.0403 | 1.00020         | 1.384 | 1.3346 | 5.31 | 0.0402 | 1.00119         | 1.370 | 1.3344 | 3.21 |
| 0.0555 | 1.00083         | 1.413 | 1.3350 | 5.23 | 0.0553 | 1.00223         | 1.392 | 1.3347 | 3.19 |
| 0.0707 | 1.00149         | 1.443 | 1.3354 | 5.15 | 0.0705 | 1.00337         | 1.415 | 1.3350 | 3.18 |
| 0.0860 | 1.00222         | 1.474 | 1.3359 | 5.10 | 0.0857 | 1.00454         | 1.439 | 1.3352 | 3.16 |

<sup>a</sup> Standard uncertainties  $u$  are:  $u(\rho) = 5 \times 10^{-5} \text{ kg}\cdot\text{m}^{-3}$ ,  $u(\eta) = 0.003 \text{ mP}\cdot\text{s}$ ,  $u(n_D) = 0.0002$ ,  $u(\text{pH}) = 0.01$ , and  $u(T) = 0.01\text{K}$

<sup>b</sup>  $w_1$  and  $w_2$  are mass fractions of  $\alpha$ - and  $\beta$ -cyclodextrin in aqueous mixture respectively

**Table S3: Apparent molar volume ( $\phi_V$ ),  $(\eta_r - 1)/\sqrt{m}$ , and molar refraction ( $R_M$ ) of selected amino acids in different mass fraction of aqueous  $\alpha$ - and  $\beta$ -cyclodextrin mixtures at 298.15 K<sup>a</sup>**

| Aq. solvent mixture | $\phi_V \times 10^{-6}$<br>/m <sup>3</sup> mol <sup>-1</sup> | $(\eta_r - 1)/\sqrt{m}$<br>/kg <sup>1/2</sup> mol <sup>-1/2</sup> | $R_M$<br>/m <sup>3</sup> mol <sup>-1</sup> | Aq. solvent mixture | $\phi_V \times 10^{-6}$<br>/m <sup>3</sup> mol <sup>-1</sup> | $(\eta_r - 1)/\sqrt{m}$<br>/kg <sup>1/2</sup> mol <sup>-1/2</sup> | $R_M$<br>/m <sup>3</sup> mol <sup>-1</sup> |
|---------------------|--------------------------------------------------------------|-------------------------------------------------------------------|--------------------------------------------|---------------------|--------------------------------------------------------------|-------------------------------------------------------------------|--------------------------------------------|
| Glycine             |                                                              |                                                                   |                                            | L-Lysine            |                                                              |                                                                   |                                            |
| $w_1 = 0.001^b$     |                                                              |                                                                   |                                            | $w_1 = 0.001^b$     |                                                              |                                                                   |                                            |
| 0.0100              | 41.18                                                        | 0.069                                                             | -                                          | 0.0100              | 105.47                                                       | 0.223                                                             | 30.1369                                    |
| 0.0251              | 40.38                                                        | 0.078                                                             | -                                          | 0.0251              | 102.87                                                       | 0.243                                                             | 30.1580                                    |
| 0.0402              | 39.93                                                        | 0.084                                                             | -                                          | 0.0403              | 101.21                                                       | 0.261                                                             | 30.1763                                    |
| 0.0553              | 39.54                                                        | 0.088                                                             | -                                          | 0.0555              | 99.73                                                        | 0.274                                                             | 30.1909                                    |
| 0.0704              | 39.17                                                        | 0.093                                                             | -                                          | 0.0707              | 98.45                                                        | 0.289                                                             | 30.2047                                    |
| 0.0855              | 38.94                                                        | 0.095                                                             | -                                          | 0.0859              | 97.51                                                        | 0.299                                                             | 30.2163                                    |
| $w_1 = 0.003^b$     |                                                              |                                                                   |                                            | $w_1 = 0.003^b$     |                                                              |                                                                   |                                            |
| 0.0100              | 41.16                                                        | 0.092                                                             | -                                          | 0.0100              | 110.42                                                       | 0.236                                                             | 30.1522                                    |
| 0.0251              | 40.35                                                        | 0.101                                                             | -                                          | 0.0251              | 107.61                                                       | 0.260                                                             | 30.1639                                    |
| 0.0401              | 39.65                                                        | 0.107                                                             | -                                          | 0.0403              | 105.41                                                       | 0.282                                                             | 30.1710                                    |
| 0.0552              | 39.15                                                        | 0.114                                                             | -                                          | 0.0554              | 103.68                                                       | 0.298                                                             | 30.1766                                    |
| 0.0703              | 38.72                                                        | 0.115                                                             | -                                          | 0.0707              | 102.26                                                       | 0.316                                                             | 30.1827                                    |
| 0.0855              | 38.33                                                        | 0.117                                                             | -                                          | 0.0859              | 100.75                                                       | 0.331                                                             | 30.1871                                    |
| $w_1 = 0.005^b$     |                                                              |                                                                   |                                            | $w_1 = 0.005^b$     |                                                              |                                                                   |                                            |
| 0.0100              | 41.13                                                        | 0.121                                                             | -                                          | 0.0100              | 115.35                                                       | 0.242                                                             | 30.1364                                    |

|                 |        |       |         |                 |        |       |         |
|-----------------|--------|-------|---------|-----------------|--------|-------|---------|
| 0.0251          | 39.93  | 0.129 | -       | 0.0251          | 111.95 | 0.277 | 30.1546 |
| 0.0401          | 39.13  | 0.136 | -       | 0.0402          | 109.34 | 0.298 | 30.1662 |
| 0.0552          | 38.58  | 0.139 | -       | 0.0554          | 107.25 | 0.319 | 30.1757 |
| 0.0703          | 37.98  | 0.146 | -       | 0.0706          | 105.20 | 0.339 | 30.1849 |
| 0.0854          | 37.48  | 0.148 | -       | 0.0859          | 103.63 | 0.359 | 30.1947 |
| L-Phenylalanine |        |       |         | L-Glutamic acid |        |       |         |
| $w_1 = 0.001^b$ |        |       |         | $w_1 = 0.001^b$ |        |       |         |
| 0.0100          | 120.51 | 0.299 | 34.0527 | 0.0100          | 84.36  | 0.169 | 30.3277 |
| 0.0251          | 119.51 | 0.335 | 34.0763 | 0.0251          | 80.95  | 0.189 | 30.3340 |
| 0.0403          | 118.76 | 0.356 | 34.0922 | 0.0402          | 78.59  | 0.199 | 30.3390 |
| 0.0555          | 118.23 | 0.385 | 34.1060 | 0.0554          | 76.61  | 0.209 | 30.3435 |
| 0.0708          | 117.79 | 0.399 | 34.1208 | 0.0706          | 74.90  | 0.220 | 30.3476 |
| 0.0861          | 117.27 | 0.419 | 34.1322 | 0.0858          | 73.21  | 0.229 | 30.3508 |
| $w_1 = 0.003^b$ |        |       |         | $w_1 = 0.003^b$ |        |       |         |
| 0.0100          | 126.45 | 0.320 | 34.0659 | 0.0100          | 89.32  | 0.175 | 30.3401 |
| 0.0251          | 124.65 | 0.366 | 34.0846 | 0.0251          | 85.71  | 0.202 | 30.3354 |
| 0.0403          | 123.20 | 0.392 | 34.0988 | 0.0402          | 82.55  | 0.217 | 30.3319 |
| 0.0555          | 121.99 | 0.421 | 34.1098 | 0.0554          | 80.02  | 0.227 | 30.3287 |
| 0.0707          | 121.01 | 0.442 | 34.1209 | 0.0705          | 78.01  | 0.239 | 30.3261 |
| 0.0861          | 120.03 | 0.463 | 34.1330 | 0.0857          | 75.99  | 0.245 | 30.3232 |
| $w_1 = 0.005^b$ |        |       |         | $w_1 = 0.005^b$ |        |       |         |
| 0.0100          | 133.38 | 0.340 | 34.0791 | 0.0100          | 94.26  | 0.189 | 30.3350 |
| 0.0251          | 130.17 | 0.392 | 34.0943 | 0.0251          | 90.06  | 0.215 | 30.3424 |
| 0.0403          | 128.12 | 0.426 | 34.1064 | 0.0402          | 86.50  | 0.230 | 30.3468 |
| 0.0555          | 126.28 | 0.456 | 34.1158 | 0.0553          | 83.98  | 0.245 | 30.3512 |
| 0.0707          | 124.37 | 0.481 | 34.1237 | 0.0705          | 81.53  | 0.259 | 30.3547 |
| 0.0860          | 123.01 | 0.509 | 34.1300 | 0.0857          | 79.12  | 0.269 | 30.3588 |
| Glycine         |        |       |         | L-Lysine        |        |       |         |
| $w_2 = 0.001^b$ |        |       |         | $w_2 = 0.001^b$ |        |       |         |
| 0.0100          | 41.17  | 0.084 | -       | 0.0100          | 107.46 | 0.260 | 30.1270 |
| 0.0251          | 40.37  | 0.092 | -       | 0.0251          | 104.86 | 0.285 | 30.1510 |
| 0.0402          | 39.67  | 0.099 | -       | 0.0403          | 103.20 | 0.306 | 30.1694 |
| 0.0553          | 39.35  | 0.104 | -       | 0.0555          | 101.90 | 0.322 | 30.1852 |
| 0.0704          | 38.88  | 0.107 | -       | 0.0707          | 100.73 | 0.338 | 30.2002 |
| 0.0855          | 38.58  | 0.110 | -       | 0.0859          | 99.85  | 0.348 | 30.2148 |
| $w_2 = 0.003^b$ |        |       |         | $w_2 = 0.003^b$ |        |       |         |
| 0.0100          | 41.15  | 0.114 | -       | 0.0100          | 113.40 | 0.274 | 30.1275 |



|                 |        |       |         |                 |        |       |         |
|-----------------|--------|-------|---------|-----------------|--------|-------|---------|
| 0.0251          | 40.34  | 0.120 | -       | 0.0251          | 109.99 | 0.308 | 30.1536 |
| 0.0401          | 39.64  | 0.129 | -       | 0.0402          | 107.64 | 0.330 | 30.1713 |
| 0.0552          | 38.96  | 0.133 | -       | 0.0554          | 105.66 | 0.353 | 30.1866 |
| 0.0703          | 38.43  | 0.135 | -       | 0.0706          | 104.09 | 0.370 | 30.2015 |
| 0.0854          | 37.96  | 0.141 | -       | 0.0859          | 102.73 | 0.382 | 30.2137 |
| $w_2 = 0.005^b$ |        |       |         | $w_2 = 0.005^b$ |        |       |         |
| 0.0100          | 41.12  | 0.128 | -       | 0.0100          | 118.32 | 0.294 | 30.1594 |
| 0.0251          | 39.91  | 0.138 | -       | 0.0251          | 114.72 | 0.334 | 30.1765 |
| 0.0401          | 39.11  | 0.143 | -       | 0.0402          | 111.81 | 0.362 | 30.1884 |
| 0.0552          | 38.38  | 0.148 | -       | 0.0554          | 109.40 | 0.385 | 30.1997 |
| 0.0703          | 37.68  | 0.151 | -       | 0.0706          | 107.31 | 0.407 | 30.2091 |
| 0.0854          | 37.11  | 0.158 | -       | 0.0859          | 105.36 | 0.423 | 30.2171 |
| L-Phenylalanine |        |       |         | L-Glutamic acid |        |       |         |
| $w_2 = 0.001^b$ |        |       |         | $w_2 = 0.001^b$ |        |       |         |
| 0.0100          | 124.51 | 0.329 | 34.0132 | 0.0100          | 86.35  | 0.184 | 30.3372 |
| 0.0251          | 122.70 | 0.372 | 34.0265 | 0.0251          | 82.94  | 0.203 | 30.3432 |
| 0.0403          | 121.25 | 0.401 | 34.0373 | 0.0402          | 80.08  | 0.218 | 30.3473 |
| 0.0555          | 120.22 | 0.426 | 34.0448 | 0.0554          | 77.87  | 0.231 | 30.3508 |
| 0.0708          | 119.35 | 0.447 | 34.0519 | 0.0706          | 75.75  | 0.243 | 30.3537 |
| 0.0861          | 118.55 | 0.465 | 34.0588 | 0.0858          | 73.91  | 0.251 | 30.3566 |
| $w_2 = 0.003^b$ |        |       |         | $w_2 = 0.003^b$ |        |       |         |
| 0.0100          | 131.43 | 0.342 | 34.0499 | 0.0100          | 92.30  | 0.198 | 30.3413 |
| 0.0251          | 128.63 | 0.394 | 34.0802 | 0.0251          | 88.09  | 0.221 | 30.3406 |
| 0.0403          | 126.92 | 0.429 | 34.1019 | 0.0402          | 85.04  | 0.239 | 30.3401 |
| 0.0555          | 125.24 | 0.456 | 34.1215 | 0.0554          | 82.19  | 0.256 | 30.3397 |
| 0.0707          | 123.85 | 0.481 | 34.1377 | 0.0705          | 79.99  | 0.267 | 30.3394 |
| 0.0861          | 122.71 | 0.501 | 34.1535 | 0.0857          | 77.63  | 0.276 | 30.3390 |
| $w_2 = 0.005^b$ |        |       |         | $w_2 = 0.005^b$ |        |       |         |
| 0.0100          | 139.34 | 0.370 | 34.0696 | 0.0100          | 98.24  | 0.211 | 30.3476 |
| 0.0251          | 135.34 | 0.424 | 34.0930 | 0.0251          | 93.63  | 0.239 | 30.3495 |
| 0.0403          | 132.84 | 0.467 | 34.1106 | 0.0402          | 89.98  | 0.260 | 30.3509 |
| 0.0555          | 130.24 | 0.501 | 34.1247 | 0.0553          | 86.68  | 0.276 | 30.3522 |
| 0.0707          | 128.33 | 0.529 | 34.1381 | 0.0705          | 83.36  | 0.290 | 30.3533 |
| 0.0860          | 126.27 | 0.554 | 34.1498 | 0.0857          | 80.87  | 0.304 | 30.3541 |

<sup>a</sup> Standard uncertainties  $u$  are:  $u(T) = 0.01\text{K}$

<sup>b</sup>  $w_1$  and  $w_2$  are mass fractions of  $\alpha$ - and  $\beta$ -cyclodextrin in aqueous mixture respectively

**Table S4: Limiting apparent molar volume ( $\phi_V^0$ ), experimental slope ( $S_V^*$ ), viscosity  $A$ - and  $B$ -coefficient, and limiting molar refraction ( $R_M^0$ ) of selected amino acids in different mass fraction of aqueous  $\alpha$ - and  $\beta$ -cyclodextrin mixtures at 298.15 K<sup>a</sup>**

| sol. mix        | $\phi_V^0$<br>/m <sup>3</sup> mol <sup>-1</sup> | $S_V^*$<br>/m <sup>3</sup> ·mol <sup>-3/2</sup><br>·kg <sup>1/2</sup> | $B$<br>/kg <sup>1/2</sup><br>·mol <sup>-1/2</sup> | $A$<br>/kg·mol <sup>-1</sup> | $R_M^0$<br>/m <sup>3</sup> mol <sup>-1</sup> | sol. mix        | $\phi_V^0$<br>/m <sup>3</sup> mol <sup>-1</sup> | $S_V^*$<br>/m <sup>3</sup> ·mol <sup>-3/2</sup><br>·kg <sup>1/2</sup> | $B$<br>/kg <sup>1/2</sup><br>·mol <sup>-1/2</sup> | $A$<br>/kg·mol <sup>-1</sup> | $R_M^0$<br>/m <sup>3</sup> mol <sup>-1</sup> |
|-----------------|-------------------------------------------------|-----------------------------------------------------------------------|---------------------------------------------------|------------------------------|----------------------------------------------|-----------------|-------------------------------------------------|-----------------------------------------------------------------------|---------------------------------------------------|------------------------------|----------------------------------------------|
| L-Lysine        |                                                 |                                                                       |                                                   |                              |                                              |                 |                                                 |                                                                       |                                                   |                              |                                              |
| $w_1 = 0.001^b$ | 109.53                                          | -41.41                                                                | 0.403                                             | 0.180                        | 30.09                                        | $w_2 = 0.001^b$ | 111.23                                          | -39.40                                                                | 0.462                                             | 0.213                        | 30.08                                        |
| $w_1 = 0.003^b$ | 115.46                                          | -49.99                                                                | 0.493                                             | 0.184                        | 30.13                                        | $w_2 = 0.003^b$ | 118.84                                          | -55.45                                                                | 0.568                                             | 0.217                        | 30.08                                        |
| $w_1 = 0.005^b$ | 121.56                                          | -61.16                                                                | 0.599                                             | 0.181                        | 30.10                                        | $w_2 = 0.005^b$ | 125.24                                          | -67.44                                                                | 0.671                                             | 0.227                        | 30.12                                        |
| L-Phenylalanine |                                                 |                                                                       |                                                   |                              |                                              |                 |                                                 |                                                                       |                                                   |                              |                                              |
| $w_1 = 0.001^b$ | 122.15                                          | -16.59                                                                | 0.619                                             | 0.236                        | 34.01                                        | $w_2 = 0.001^b$ | 127.57                                          | -30.98                                                                | 0.703                                             | 0.259                        | 33.98                                        |
| $w_1 = 0.003^b$ | 129.86                                          | -33.35                                                                | 0.737                                             | 0.247                        | 34.03                                        | $w_2 = 0.003^b$ | 135.89                                          | -45.12                                                                | 0.822                                             | 0.262                        | 33.99                                        |
| $w_1 = 0.005^b$ | 138.77                                          | -53.66                                                                | 0.862                                             | 0.254                        | 34.05                                        | $w_2 = 0.005^b$ | 146.09                                          | -67.14                                                                | 0.960                                             | 0.274                        | 34.02                                        |
| L-Glutamic acid |                                                 |                                                                       |                                                   |                              |                                              |                 |                                                 |                                                                       |                                                   |                              |                                              |
| $w_1 = 0.001^b$ | 90.10                                           | -57.46                                                                | 0.303                                             | 0.139                        | 30.31                                        | $w_2 = 0.001^b$ | 93.04                                           | -64.91                                                                | 0.355                                             | 0.148                        | 30.32                                        |
| $w_1 = 0.003^b$ | 96.49                                           | -69.70                                                                | 0.359                                             | 0.143                        | 30.34                                        | $w_2 = 0.003^b$ | 100.06                                          | -75.91                                                                | 0.412                                             | 0.157                        | 30.34                                        |
| $w_1 = 0.005^b$ | 102.28                                          | -78.44                                                                | 0.415                                             | 0.148                        | 30.32                                        | $w_2 = 0.005^b$ | 107.79                                          | -90.99                                                                | 0.482                                             | 0.163                        | 30.34                                        |

<sup>a</sup> Standard uncertainties  $u$  are:  $u(T) = 0.01\text{K}$

<sup>b</sup>  $w_1$  and  $w_2$  are mass fractions of  $\alpha$ - and  $\beta$ -cyclodextrin in aqueous mixture respectively
